# Supplementary material for: Hangman effect on hydrogen peroxide dismutation by Fe(iii) corroles
Source: Royal Society of Chemistry journal article supplement (doi:10.1039/c2cc30580a), 2012-01-01
Supplement: c2cc30580a.pdf [file c2cc30580a.pdf]

## Supporting Information

# Hangman Effect on Hydrogen Peroxide Dismutation by Fe(III) Corroles

Daniel J. Graham, Dilek K. Dogutan, Matthias Schwalbe and Daniel G. Nocera\*

*Department of Chemistry, Massachusetts Institute of Technology, 77 Massachusetts Avenue,  
Cambridge, MA 02139, USA*

nocera@mit.edu

| <i>Index</i>                                                      | <i>Page</i> |
|-------------------------------------------------------------------|-------------|
| Materials and Methods                                             | S2          |
| Synthesis of Compounds                                            | S2–S4       |
| NMR Spectra of <b>2-py</b> and <b>3-Et<sub>2</sub>O</b>           | S5–S8       |
| UV-Vis Spectra of <b>2-py</b> in pentane and in THF               | S9          |
| UV-Vis Spectra of <b>2-py</b> and <b>3-Et<sub>2</sub>O</b> in THF | S10         |
| Mass Spectra                                                      | S11–S12     |

## Materials and Methods

$^1\text{H}$  NMR spectra were recorded at ambient temperature on a Varian Mercury 300 MHz spectrometer. All  $^1\text{H}$  NMR spectra were referenced to deuterated benzene ( $\text{C}_6\text{D}_6$ ) as an internal standard (measured values for  $\delta$  are given in parts per million (ppm) and for  $J$  in Hertz (Hz)).  $^{19}\text{F}$  NMR spectra were referenced to  $\text{CFCl}_3$  in  $\text{CDCl}_3$ . Electrospray ionization mass spectra (ESI-MS) were obtained using a Bruker Daltonics APEXIV 4.7 T FT-ICR-MS instrument at the DCIF facility of MIT.

UV-vis spectra were recorded at room temperature in 10 mm path length quartz cuvettes on compound dissolved in anhydrous THF or pentane on a Varian Cary 5000 UV-vis-NIR spectrophotometer employing the software Cary WinUV. In a glovebox, the quartz cuvette was filled with 3.0 mL of solvent. From a stock solution, Fe(III) corrole was added to the cuvette, which was sealed and removed from the glovebox.

4-Formyl-5-bromo-2,7-di-tert-butyl-9,9-dimethylxanthene<sup>1</sup> 5-pentafluorophenyl-dipyrromethane,<sup>2</sup> 5,10,15-tris(pentafluorophenyl)corrole,<sup>3,4</sup> and 1-py<sup>5</sup> were prepared as described in the literature. THF (anhydrous), DMF (anhydrous), pyridine (anhydrous), methanol (anhydrous), diethyl ether (anhydrous), pentane (anhydrous), 30 wt %  $\text{H}_2\text{O}_2$  in  $\text{H}_2\text{O}$  and pyridine were reagent grade and were used as received. ESI-MS data was measured on corroles in Ar-saturated EtOAc.

The procedure to measure  $\text{H}_2\text{O}_2$  disproportionation is as follows. 1  $\mu\text{mol}$  of the iron corrole was placed in an oven-dried vial containing magnetic stirbar and 1,5-dicyclohexylimidazole (6.0 mg, 26  $\mu\text{mol}$ ). Under an inert atmosphere, dry THF (1.5 mL) was added, and the vial was sealed with a septum and secured with a plastic zip-tie. A cannula needle was inserted into the vial and was purged thoroughly with Ar. The cannula needle was removed. of Ar-saturated MeOH (0.5 mL) and Ar-saturated  $\text{H}_2\text{O}_2$  (0.11 mL, 30% wt in  $\text{H}_2\text{O}$ , 1.0 mmol, 1000 eq.) were added to the solution at time = 0, the syringe plunger was retracted to 0.11 mL and removed. The increase in the headspace volume due to generation of  $\text{O}_2$  was measured through insertion of one end of the cannula needle into a 25 mL graduated pipette, which had been filled with water, inverted and submerged in water. Volume was converted to moles with the ideal gas law. Turnover frequencies were calculated from the amount of  $\text{O}_2$  evolved after 20 seconds.

<sup>1</sup> C. J. Chang, C. H. Yeh and D. G. Nocera, *J. Org. Chem.*, 2002, **67**, 1403.

<sup>2</sup> J. K. Laha, S. Dhanalekshmi, M. Taniguchi, A. Ambroise and J. S. Lindsey, *Org. Process Res. Dev.*, 2003, **7**, 799.

<sup>3</sup> D. K. Dogutan, S. A. Stoian, R. McGuire Jr., M. Schwalbe, T. S. Teets and D. G. Nocera, *J. Am. Chem. Soc.*, 2011, **133**, 131.

<sup>4</sup> Schwalbe, M.; Dogutan, D. K.; Stoian, S. A.; Teets, T. S.; Nocera, D. G. *Inorg. Chem.*, 2011, **50**, 1368.

<sup>5</sup> L. Simkhovich, I. Goldberg and Z. Gross, *Inorg. Chem.*, 2002, **41**, 5433.

## Synthesis of Compounds

**10-(4-(5-bromo-2,7-di-*tert*-butyl-9,9-dimethyl-xanthene)-5,15-bis(pentafluorophenyl)corrolatoiron(III) pyridine adduct (2-py).** Following published procedures for Fe insertion into corroles,<sup>5</sup> 10-(4-(5-Bromo-2,7-di-*tert*-butyl-9,9-dimethyl-xanthenyl))-5,15-bis(pentafluorophenyl) corrole (20.0 mg, 19.4  $\mu\text{mol}$ ) was dissolved in dry pyridine (10 mL) in a 100 mL 3-necked round bottom flask. After thorough purging with Ar, anhydrous  $\text{FeCl}_2$  (40 mg, 0.31 mmol, 16 mole equiv.) was added under strong Ar flow, and the solution was immediately refluxed in a pre-heated 125 °C oil bath. After 30 min the flask was removed from the oil bath and volatiles were removed *in vacuo*. The flask was transferred to a glovebox and the solids were filtered through a celite plug with  $\text{Et}_2\text{O}$ . The volatiles were removed *in vacuo* and the resulting solids were filtered through a celite plug with pentane. The volatiles were removed *in vacuo* to afford **2-py** as a dark red solid (21.3 mg, 94.6% yield).  $^1\text{H}$  NMR (300 MHz,  $\text{C}_6\text{D}_6$ , 20 °C):  $\delta$  = 31.80 (br, py-H), 22.16 (br, py-H), -2.057 (corrole  $\beta$ -H, 2H), -59.79 (br, corrole  $\beta$ -H, 2H), -65.58 (br, corrole  $\beta$ -H, 2H), -125.42 (br, corrole  $\beta$ -H, 2H). Hangman backbone  $^1\text{H}$  resonances unidentifiable.  $^{19}\text{F}$  NMR (300 MHz,  $\text{C}_6\text{D}_6$ , 20 °C):  $\delta$  = -95.4 (*ortho*-F, 2F), -111.8 (*ortho*-F, 2F), -150.8 (*para*-F, 2F), -156.3 (*meta*-F, 2F), -156.9 (*meta*-F, 2F).  $M = \text{C}_{54}\text{H}_{36}\text{BrF}_{10}\text{FeN}_4\text{O}$ : 1081.1262, ( $M$  + pyridine): 1160.1684; Found for ESI-MS:  $[(M + \text{H})^+ + \text{pyridine}]$ : 1162.1630;  $[(M - \text{Br})^+ + \text{pyridine}] = 1181.25$ .  $\lambda_{\text{max,abs}}/\text{nm}$  ( $\epsilon \times 10^{-3}$ ) (pentane) = 407 (24), 556 (8.1), 758 (1.4),  $\lambda_{\text{max,abs}}/\text{nm}$  ( $\epsilon \times 10^{-3}$ ) (THF) = 406 (24), 556 (8.5), 737 (1.7)

**10-(4-(5-Hydroxycarbonyl-2,7-di-*tert*-butyl-9,9-dimethyl-xanthene)-5,15-bis(pentafluorophenyl)corrolatoiron(III) diethyl ether adduct (3-Et<sub>2</sub>O).** Following published procedures for Fe insertion into corroles,<sup>5</sup> 10-(4-(5-hydroxycarbonyl-2,7-di-*tert*-butyl-9,9-dimethylxanthenyl))-5,15-bis(pentafluorophenyl)corrole (27.4 mg, 27.4  $\mu\text{mol}$ ) was dissolved in dry DMF (10 mL) in a 100 mL 3-necked round bottom flask. After purging with Ar, anhydrous  $\text{FeCl}_2$  (60 mg, 0.50 mmol, 20 equiv.) was added under strong Ar flow. The solution was immediately placed in a pre-heated 150 °C oil bath and brought to reflux. After 30 min the flask was removed from the oil bath and volatiles were removed *in vacuo*. The flask was transferred to a glovebox and the solids were filtered through a celite plug with  $\text{Et}_2\text{O}$ . The volatiles were removed *in vacuo* and the resulting solids were filtered through a celite plug with pentane to afford **3-Et<sub>2</sub>O** as a dark red solid (29.5 mg, 96.0%).  $^1\text{H}$  NMR (300 MHz,  $\text{C}_6\text{D}_6$ , 20 °C):  $\delta$  = 13.90 (br, corrole  $\beta$ -H, 2H), 9.72 (br, corrole  $\beta$ -H, 2H), -59.27, (br, corrole  $\beta$ -H, 2H), -112.8 (br, corrole  $\beta$ -H, 2H). Hangman backbone  $^1\text{H}$  resonances unidentifiable.  $^{19}\text{F}$  NMR (300 MHz,  $\text{C}_6\text{D}_6$ , 20 °C):  $\delta$  = -92.4 (*ortho*-F, 2F), -106.6 (*ortho*-F, 2F), -148.0 (*para*-F, 2F), -153.6 (*meta*-F, 2F), -154.3 (*meta*-F, 2F).  $M = \text{C}_{55}\text{H}_{37}\text{F}_{10}\text{FeN}_4\text{O}_3$ : 1047.2055, ( $M$  + diethylether): 1121.2787; Found for ESI-MS:  $[(M - \text{H}) + \text{diethylether}]$ : 1120.28  $\lambda_{\text{max,abs}}/\text{nm}$  ( $\epsilon \times 10^{-3}$ ) (THF) = 406 (31), 556 (11), 737 (1.9).

**10-(4-(5-Bromo-2,7-di-*tert*-butyl-9,9-dimethylxanthenyl))-5,15-bis(pentafluorophenyl)corrolatoiron chloride (2-Cl).** Following the published procedure,<sup>5</sup> in a

scintillation vial, **2-py** (1.2 mg, 1.0  $\mu\text{mol}$ ) was dissolved in DCM and washed with 4% HCl in  $\text{H}_2\text{O}$  (10 mL). The organic layer was dried over  $\text{Na}_2\text{SO}_4$  and evaporated to dryness.

**10-(4-(5-Hydroxycarbonyl-2,7-di-*tert*-butyl-9,9-dimethylxanthenyl))-5,15-bis-(pentafluorophenyl)corrolato Iron Chloride (3-Cl).** Following the published procedure,<sup>5</sup> **3-Et<sub>2</sub>O** (1.1 mg, 1.0  $\mu\text{mol}$ ) was placed in an oven dried scintillation vial and dissolved in DCM and washed with 4% HCl (10 mL) in  $\text{H}_2\text{O}$ . The organic layer was dried over  $\text{Na}_2\text{SO}_4$  and evaporated to dryness.

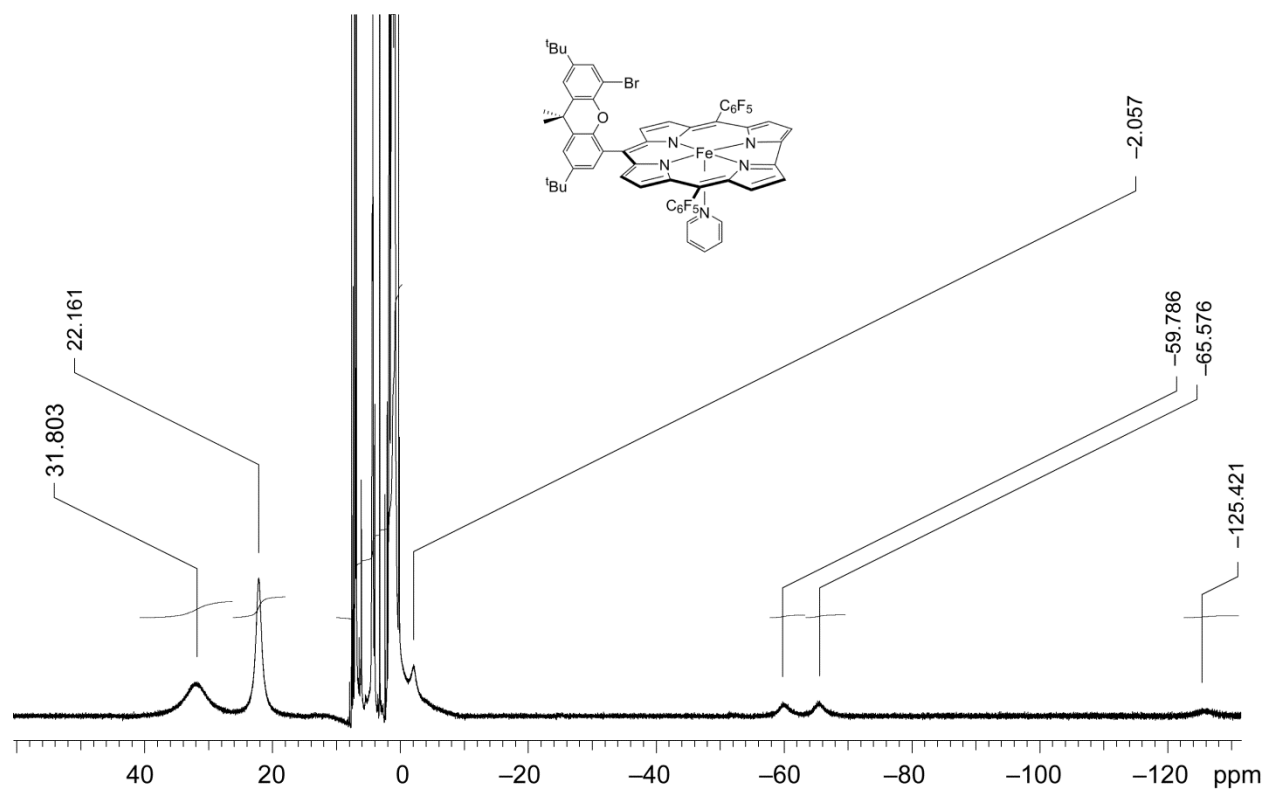

**Figure S1.**  $^1\text{H}$  NMR spectrum of **2-py** in  $\text{C}_6\text{D}_6$  at room temperature.

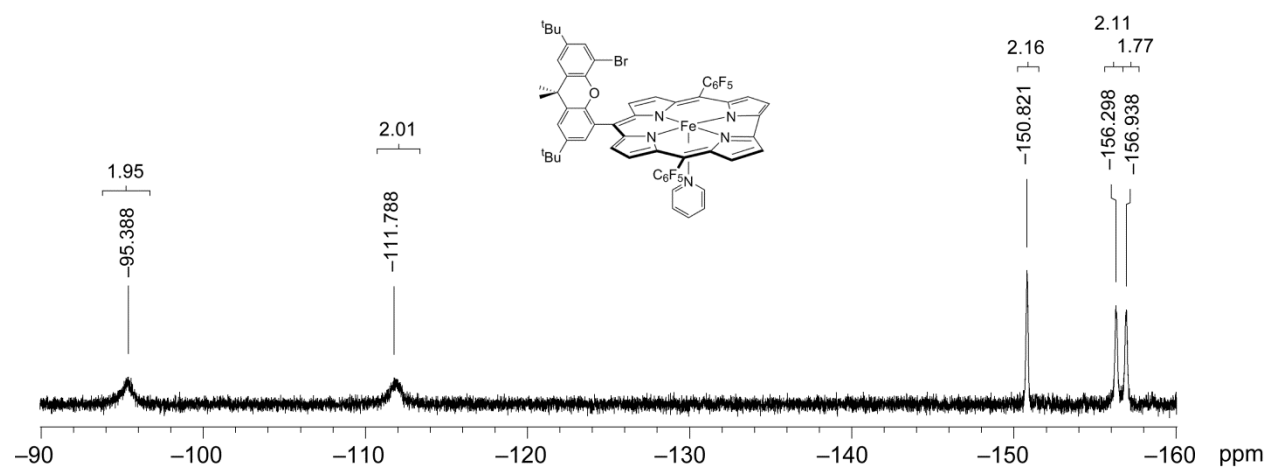

**Figure S2.**  $^{19}\text{F}$  NMR spectrum of **2-py** in  $\text{C}_6\text{D}_6$  at room temperature.

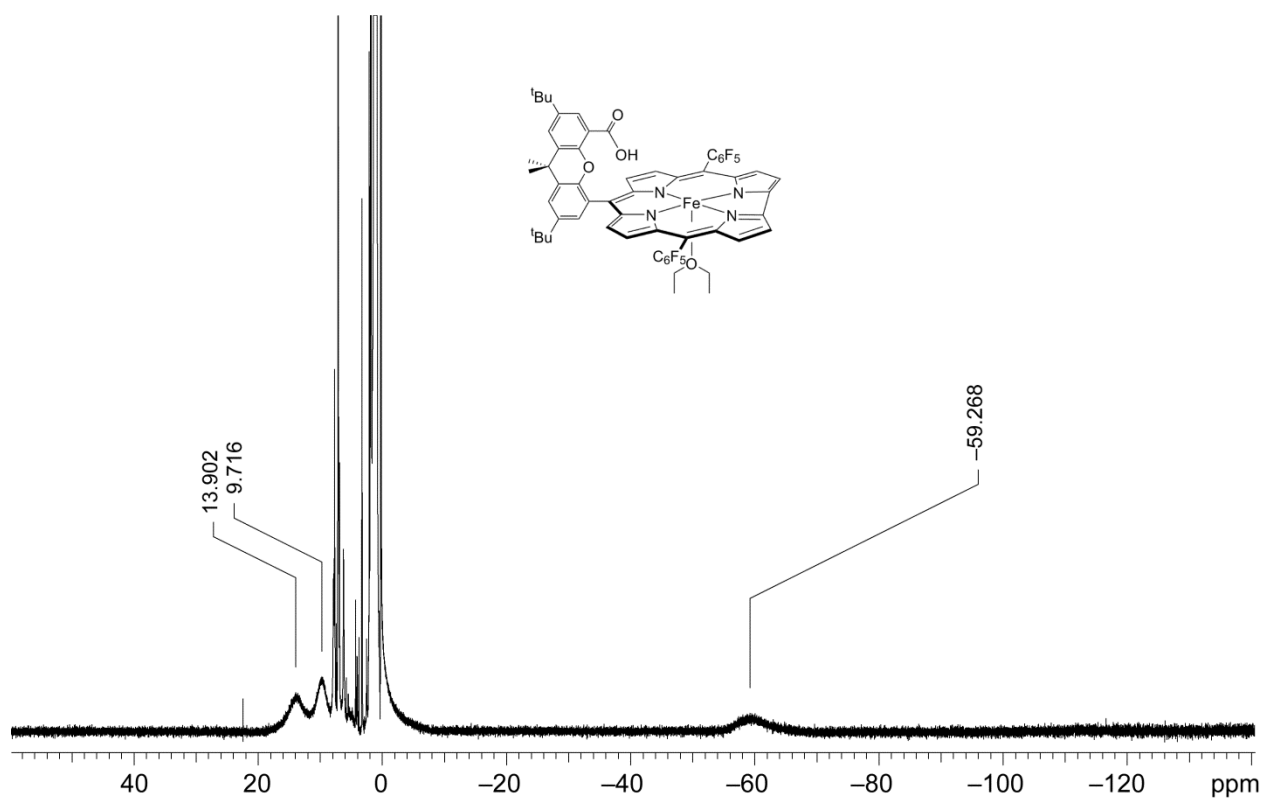

**Figure S3.**  $^1\text{H}$  NMR spectrum of **3-Et<sub>2</sub>O** in  $\text{C}_6\text{D}_6$  at room temperature.

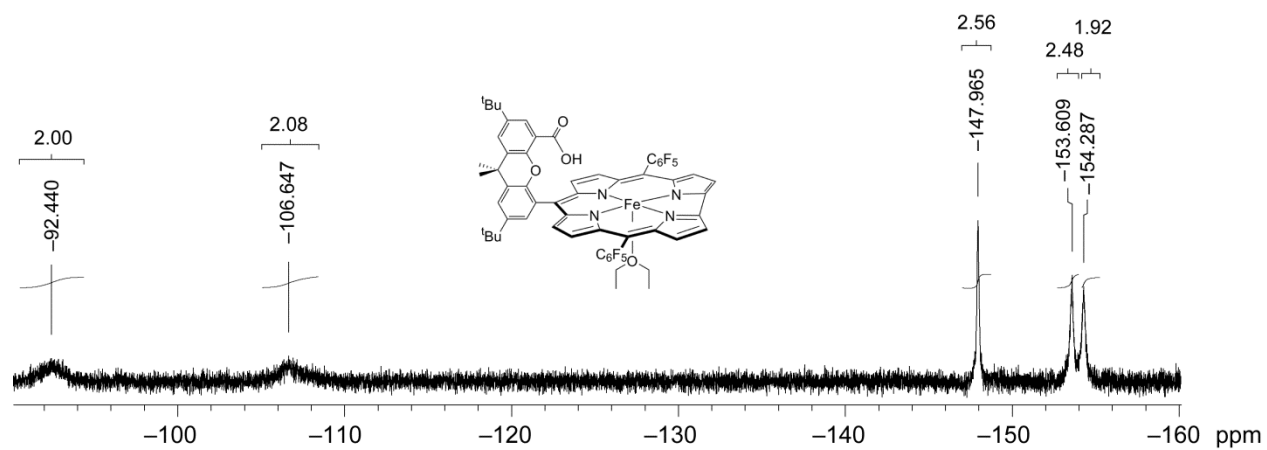

**Figure S4.**  $^{19}\text{F}$  NMR spectrum of **3-Et<sub>2</sub>O** in  $\text{C}_6\text{D}_6$  at room temperature.



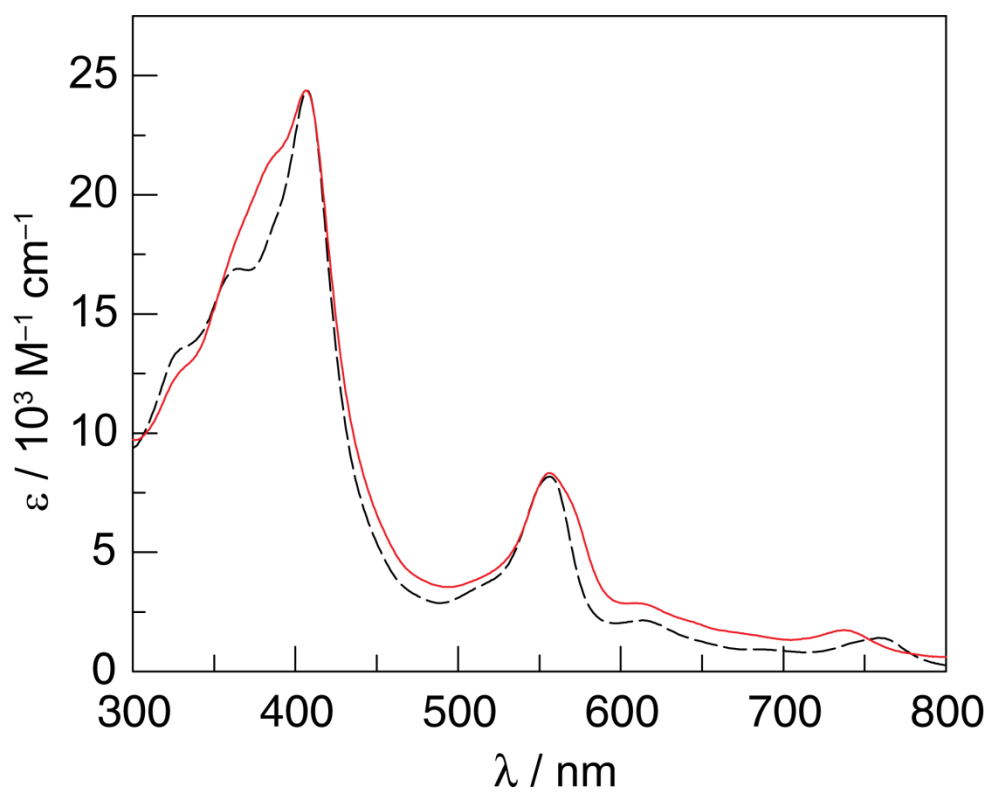

**Figure S5.** Absorption spectra of **2-py** in pentane ( - - - ) and in THF ( — ).

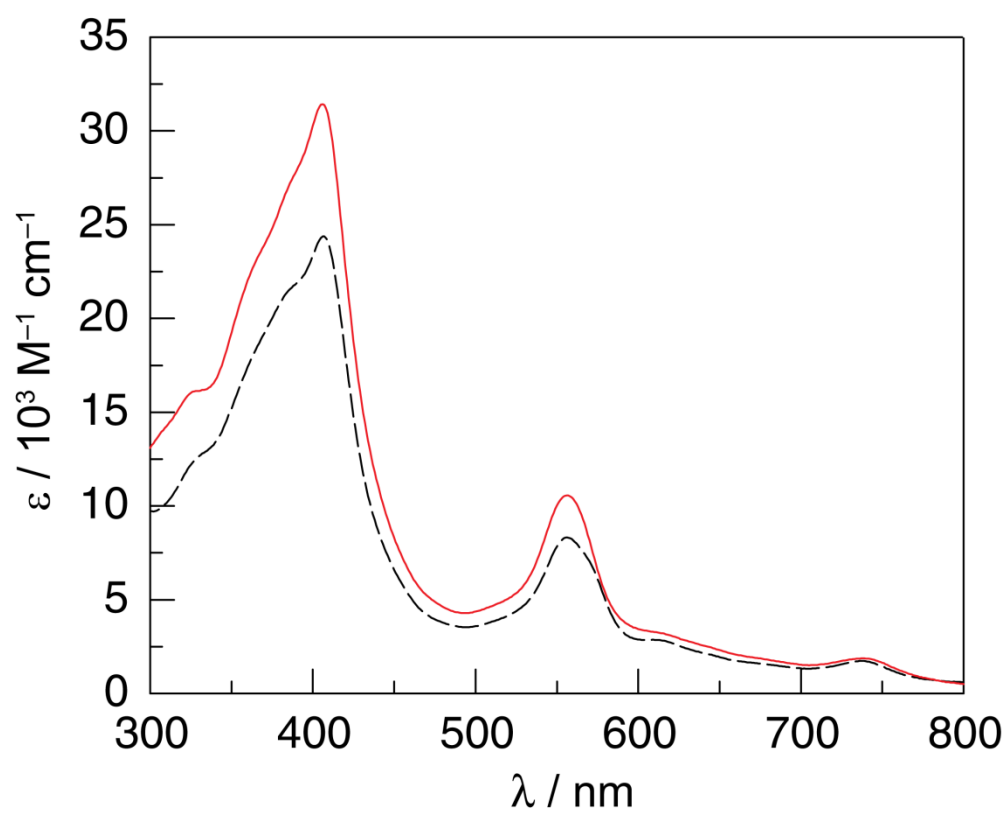

**Figure S6.** Absorption spectra of **2-py** (---) and **3-Et<sub>2</sub>O** (—) in THF.

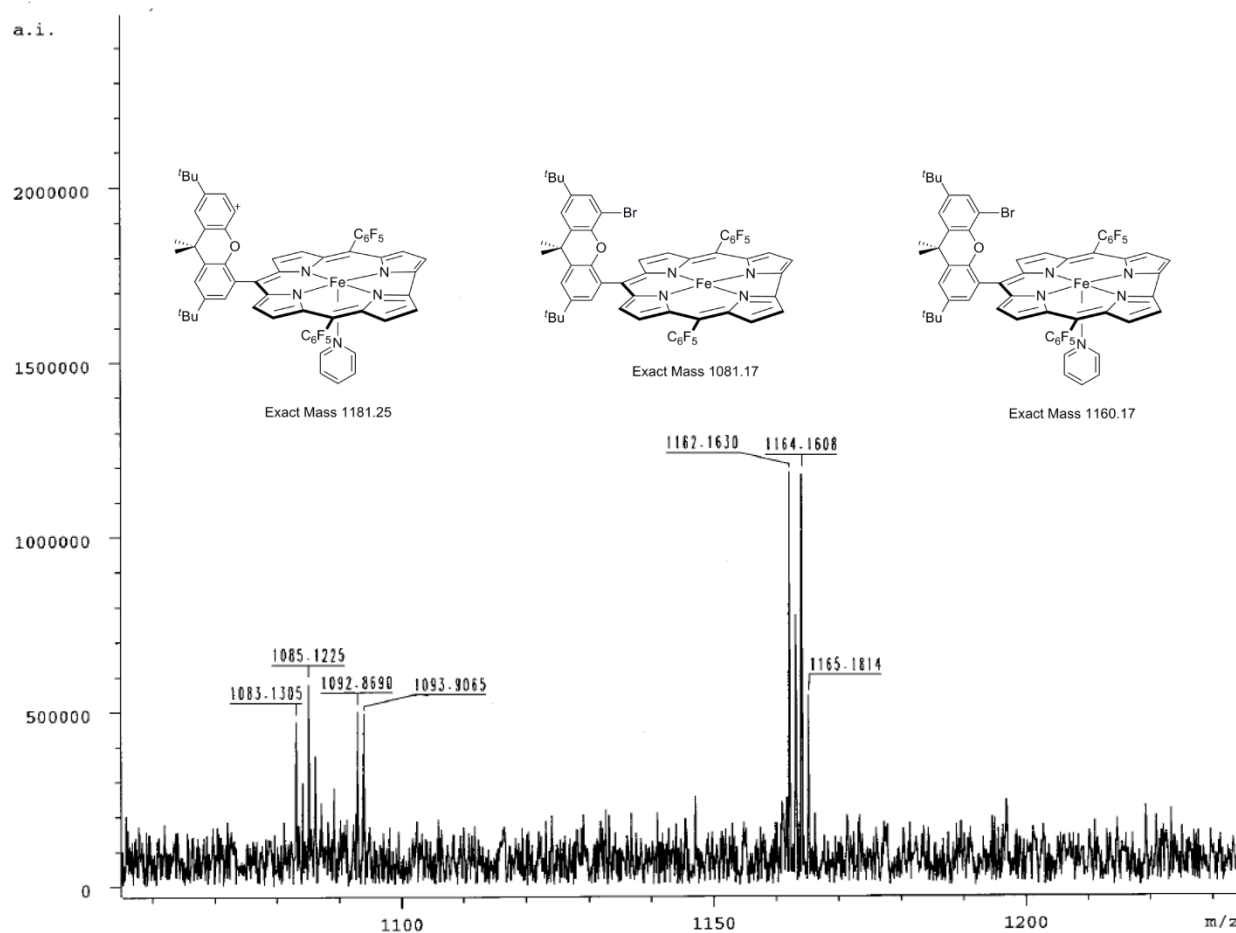

**Figure S7.** ESI-MS spectrum of **2-py**.

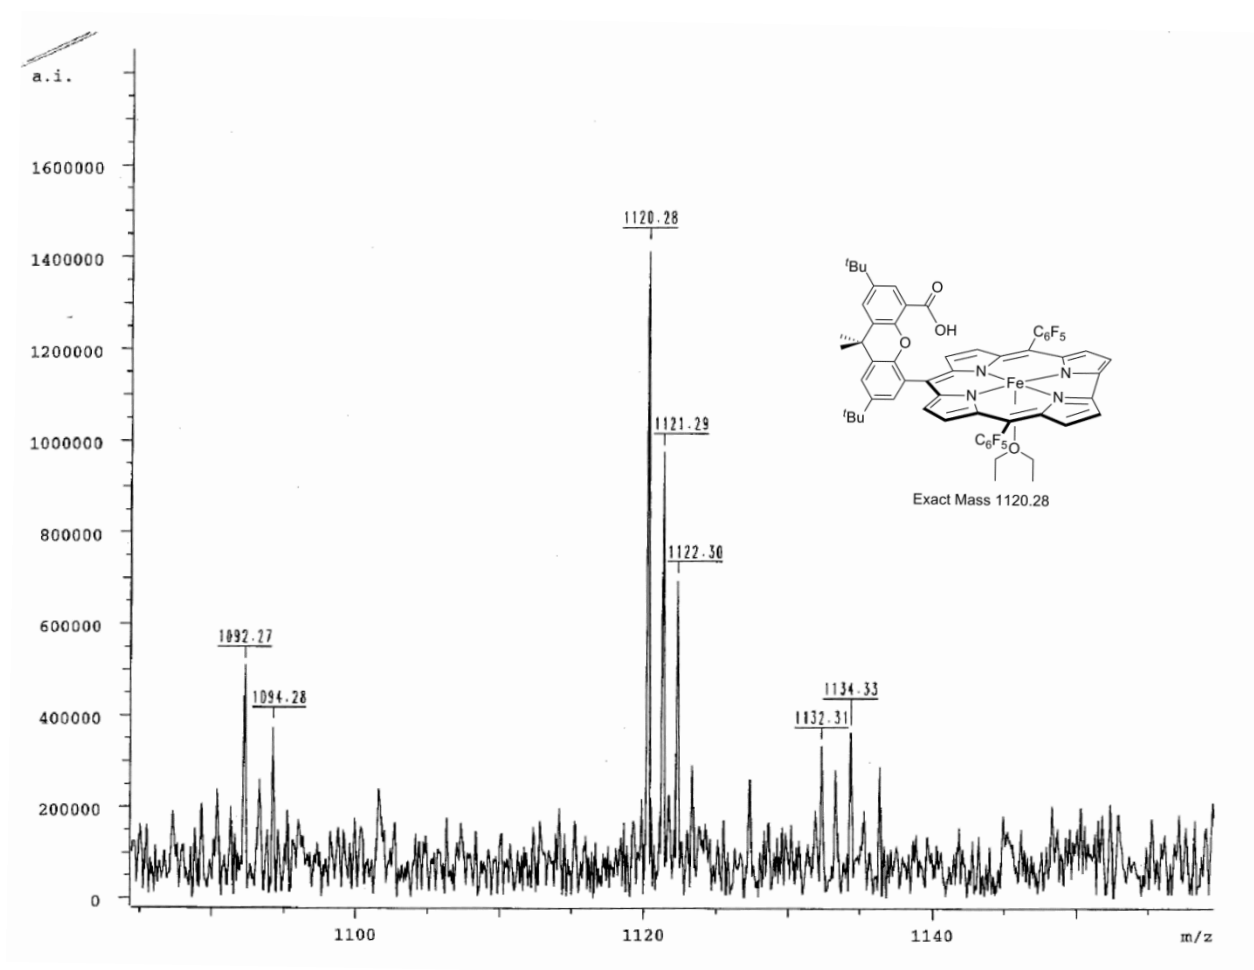

**Figure S8.** ESI-MS spectrum of 3-Et<sub>2</sub>O.
